# Supplementary material for: Correlating Air Pollution Concentrations and Vehicular Emissions in an Italian Roadway Tunnel by Means of Low Cost Sensors
Source: MDPI journal article supplement (doi:10.3390/atmos14040679), 2023-04-04

# Correlating Air Pollution Concentrations and Vehicular Emissions in an Italian Roadway Tunnel by Means of Low Cost Sensors

Saverio De Vito <sup>1</sup>, Antonio Del Giudice <sup>1</sup>, Gerardo D'Elia <sup>1</sup>, Elena Esposito <sup>1,\*</sup>, Grazia Fattoruso <sup>1</sup>, Sergio Ferlito <sup>1</sup>, Fabrizio Formisano <sup>1</sup>, Giuseppe Loffredo <sup>1</sup>, Ettore Massera <sup>1</sup>, Patrizia Bellucci <sup>2</sup>, Francesca Ciarallo <sup>2</sup> and Girolamo Di Francia <sup>1</sup>

<sup>1</sup> ENEA Italian National Agency for New Technologies, Energy and Sustainable Economic Development, Centro Ricerche Portici, 80055, Portici, Italy

<sup>2</sup> ANAS Azienda Nazionale Autonoma delle Strade Statali S.p.A., 10-00185, Roma, Italy

\* Correspondence: elena.esposito@enea.it

**Figure S1:** CO concentration estimation (4-minutes sampling period) in the tunnel, during the trimester under investigation.

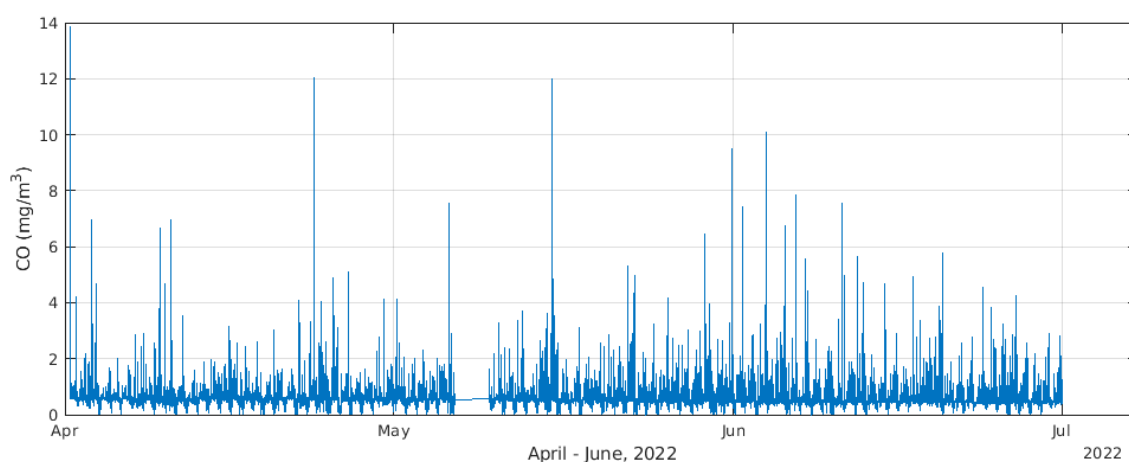

**Table S1:** Standard error in averaged concentrations computation for gas, PM and environmental parameters monitored by MONICA, inside the tunnel and on the Viaduct, in the trimester April - June.

| Parameter                              | MONICA Tunnel |                             | MONICA Outside |                             |
|----------------------------------------|---------------|-----------------------------|----------------|-----------------------------|
|                                        | Range         | Mean<br>(standard<br>error) | Range          | Mean<br>(standard<br>error) |
| T (°C)                                 | (15 - 37)     | 26 (0.02)                   | (11 - 48)      | 29 (0.04)                   |
| RH (%)                                 | (19 - 62)     | 42 (0.04)                   | (9 - 62)       | 31 (0.05)                   |
| CO (mg/m <sup>3</sup> )                | (0 - 14)      | 0.50 (0.01)                 | (0 - 1.8)      | 0.38 (5e-04)                |
| NO <sub>2</sub> (µg/m <sup>3</sup> )   | (27 - 291)    | 89 (0.11)                   | (0 - 125)      | 33 (0.08)                   |
| O <sub>3</sub> (µg/m <sup>3</sup> )    | -             | -                           | (0 - 166)      | 51 (0.14)                   |
| PM <sub>1</sub> (µg/m <sup>3</sup> )   | (0 - 200)     | 10 (0.04)                   | (0 - 130)      | 8 (0.02)                    |
| PM <sub>2.5</sub> (µg/m <sup>3</sup> ) | (0 - 312)     | 12 (0.05)                   | (0 - 185)      | 10 (0.03)                   |
| PM <sub>10</sub> (µg/m <sup>3</sup> )  | (0 - 351)     | 14 (0.06)                   | (0 - 198)      | 11 (0.03)                   |

**Figure S2:** Boxplot of PM<sub>1</sub> concentration estimation in the tunnel during the trimester April - June under investigation.

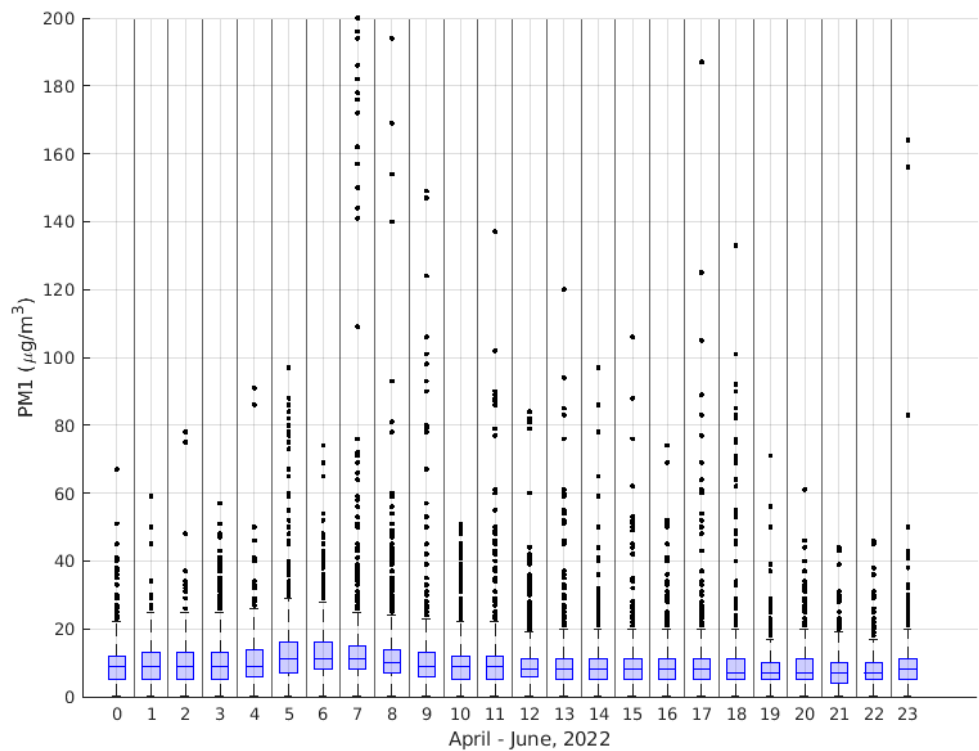

**Figure S3:** Boxplot of PM<sub>2.5</sub> concentration estimation in the tunnel during the trimester April - June under investigation.

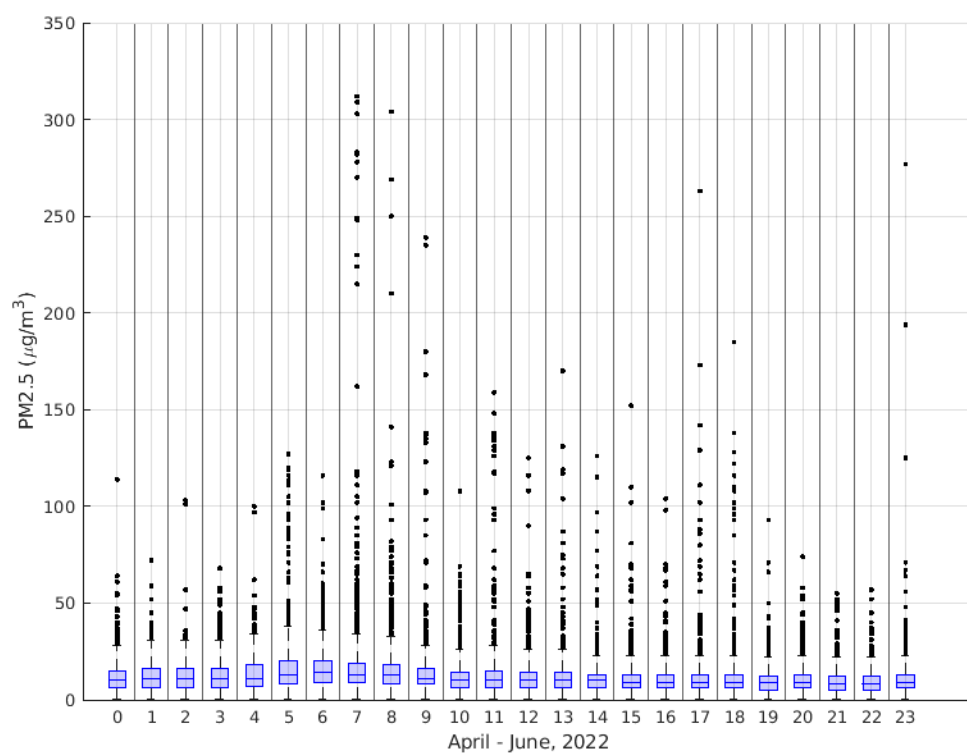

**Figure S4:** Boxplot of PM<sub>10</sub> concentration estimation in the tunnel during the trimester April - June under investigation.

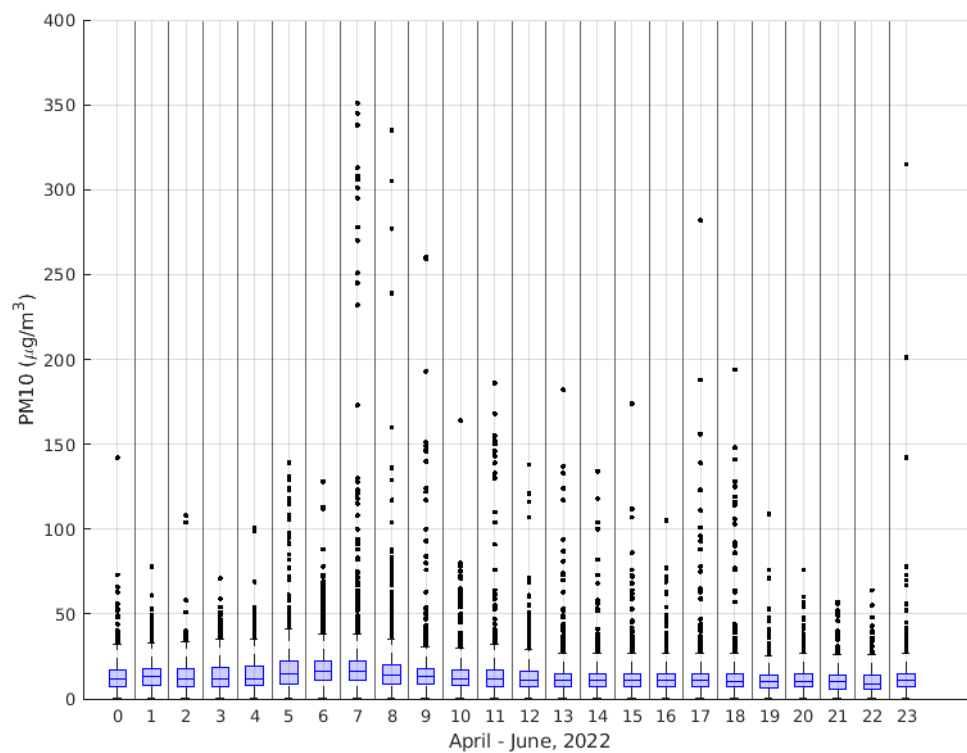

Supplement: s1 [file s1]
